# Supplementary material
Source: PubMed Central journal article supplement (PMC11386726)
Supplement: PBI-17-858-s002.pdf [file PBI-17-858-s002.pdf]

**Table S1** The depth of whole genome sequencing data.

| Lines          | Clean reads | Depth |
|----------------|-------------|-------|
| AP2 (s1)       | 276,317,592 | 33.16 |
| AP2 (s3)       | 349,228,878 | 41.91 |
| AP2 (s4)       | 241,999,512 | 29.04 |
| AP2 (s15)      | 325,942,108 | 39.11 |
| MYB44 (s62)    | 270,028,347 | 32.4  |
| MYB44 (s75)    | 332,968,819 | 39.96 |
| MYB44 (s76)    | 236,182,978 | 28.34 |
| MYB44 (s77)    | 299,672,131 | 35.96 |
| ARC (s84)      | 307,048,805 | 36.85 |
| ARC (s85)      | 343,856,655 | 41.26 |
| ARC (s91)      | 323,548,452 | 38.83 |
| ARC (s94)      | 214,255,989 | 25.71 |
| WT (s79)       | 266,298,091 | 31.96 |
| WT (s195)      | 349,729,772 | 41.97 |
| WT (s199)      | 305,949,666 | 36.71 |
| Negative (s65) | 267,054,241 | 32.05 |
| Negative (s66) | 265,930,235 | 31.91 |
| Negative (s67) | 256,955,621 | 30.83 |
| AP2 (s20)      | 292,204,731 | 35.06 |
| AP2 (s23)      | 297,618,345 | 35.71 |

**Table S2** Summary of target genes in CRISPR/Cas9 editing.

| Targets | sgRNA  | Chr | start    | end      | Chr | start    | end      |
|---------|--------|-----|----------|----------|-----|----------|----------|
| AP2     | sgRNA1 | D13 | 58193326 | 58193348 | D12 | 12897468 | 12897490 |
| AP2     | sgRNA2 | D13 | 58192611 | 58192633 | A12 | 17278125 | 17278147 |
| MYB44   | sgRNA1 | A06 | 1366589  | 1366611  | -   | -        | -        |
| MYB44   | sgRNA2 | A06 | 1366400  | 1366422  | -   | -        | -        |
| ARC     | sgRNA1 | A06 | 15589953 | 15589975 | D06 | 11882100 | 11882122 |
| ARC     | sgRNA2 | A06 | 15589221 | 15589243 | D06 | 11881368 | 11881390 |

The AP2 sgRNA1 and sgRNA2 have two homologous target loci (At- and Dt-subgenome loci), respectively. ARC sgRNA1 and sgRNA2 have two homologous target loci (At- and Dt-subgenome loci), MYB44 sgRNA1 and sgRNA2 have single loci (At loci).

**Table S3** The different on-target site mutation frequency of AP2, *MYB44*, *ARC* in each target site by Sanger sequencing.

| AP2 (42)                          | types | Sanger clone |
|-----------------------------------|-------|--------------|
| AP2 sgRNA1 (WT Sequence)          |       |              |
| <b>CCTTTTAGGCAGGATGCAACCAT</b>    |       |              |
| Cas9 mutants (s1, s3, s4, s15)    |       |              |
| <b>CCTTTTAGGCAGGATGCAACCAT</b>    | no    | 9            |
| <b>CCTTTTAAGGCAGGATGCAACCAT</b>   | i1    | 10           |
| <b>CCTTTTA--CAGGATGCAACCAT</b>    | d2    | 2            |
| <b>CCTTTT--GCAGGATGCAACCAT</b>    | d2    | 10           |
| <b>CCTTTT----AGGATGCAACCAT</b>    | d4    | 1            |
| <b>CCTTTTC---AGGATGCAACCAT</b>    | i1+d3 | 2            |
| <b>CCTTTT----AGGACGCAACCAT</b>    | s1+d5 | 1            |
| <b>CCTTTTAGGCAGGATGCAACCAT</b>    | other | 1            |
| <b>CCTTCTATAGTGTCACCTAAATAGCT</b> | other | 2            |
| TT-----GG                         | d18   | 4            |
| AP2 sgRNA2 (WT Sequence)          |       |              |
| <b>TTATACCATCGGACTTTGCTAGG</b>    |       |              |
| Cas9 mutants (s1, s3, s4, s15)    |       |              |
| TTATACCATCGGACTTTGCT <b>AGG</b>   | no    | 7            |
| TTATACCATCGGACTTTGCT <b>AGA</b>   | s1    | 2            |
| TTATACCATCGGACT <b>AATCTAGG</b>   | s3    | 5            |
| TTATACCATCGGACTTT <b>TGCTAGG</b>  | i1    | 5            |
| TTATACCATCGGACT-TGCT <b>AGG</b>   | d1    | 11           |
| TTATACCATCGGAC--TGCT <b>AGG</b>   | d2    | 3            |
| TTATACCATCGGAC---GCT <b>AGG</b>   | d3    | 1            |
| TTATACCATCGGACTTTGCT---           | d3    | 1            |
| TTATACCATCGGAC----CT <b>AGG</b>   | d4    | 1            |
| TTATACCATCGG-----GCT <b>AGG</b>   | d5    | 2            |
| CTTT-----GCT <b>AGG</b>           | d13   | 1            |
| CTTTCTCATAGCTCACGCTGT <b>AGG</b>  | other | 2            |
| CTTTGCT <b>AGG</b>                | other | 1            |
| TTATACCATCGGACACT <b>AGG</b>      | other | 1            |
| TTATACCATCGGACCT <b>AGG</b>       | other | 1            |
| TTATACCATCGGACGCT <b>AGG</b>      | other | 1            |
| TTATACCATCGGGCT <b>AGG</b>        | other | 2            |
| <i>MYB44</i> (53)                 |       |              |
| <i>MYB44</i> sgRNA1 (WT Sequence) |       |              |
| <b>TTGGCTGCTCACTGTGTTATGG</b>     |       |              |

|                                                                |       |    |
|----------------------------------------------------------------|-------|----|
| TTGGCTGCTCACTGT-TTTA <b>TGG</b>                                |       |    |
| TTGGCTGCTCACTGTGTTTA <b>TGG</b>                                | no    | 9  |
| TT <b>A</b> GCTGCTCACTGTGTTTA <b>TGG</b>                       | s1    | 1  |
| TTGG <b>C</b> GCTCACGGTGTTTA <b>TGG</b>                        | s1    | 1  |
| TTGGCTGCTCAC <b>GG</b> TGCTTA <b>TGG</b>                       | s1    | 14 |
| TTGGCTGCTCAC <b>CG</b> TGTTTA <b>TGG</b>                       | s1    | 1  |
| TTGG <b>C</b> TGCTCACTGTGCTTA <b>TGG</b>                       | s1    | 1  |
| TTGGCTGCTCAC <b>GG</b> T <b>C</b> TTA <b>TGG</b>               | s2    | 1  |
| TTGGCTGCTCACTGT-TTTA <b>TGG</b>                                | d1    | 1  |
| TTGGCTGCTCACTGTG-TTA <b>TGG</b>                                | d1    | 1  |
| TTGGCTGCTCACTGT--TTA <b>TGG</b>                                | d2    | 9  |
| TTGGCTGCTCACTGT---TA <b>TGG</b>                                | d3    | 7  |
| TTGGCTGCTCACT-----TA <b>TGG</b>                                | d5    | 4  |
| TTGGCTGCTCCGGTGTTTA <b>TGG</b>                                 | other | 1  |
| TTGGCTGCTCCTGTTT <b>T</b> A <b>TGG</b>                         | other | 1  |
| TTGGTTGCTCATTGTCTTA <b>TGG</b>                                 | other | 1  |
| MYB44 sgRNA2 (WT Sequence)                                     |       |    |
| <b>CCA</b> CCGGGGAGTGGTGGGGGGTT                                |       |    |
| <b>CCA</b> CCGGGGAGTGGTGGGGGGTT                                | no    | 0  |
| <b>CCG</b> CCGGGGAGTGGTGGGGGGTT                                | s1    | 3  |
| <b>CCA</b> CC <b>A</b> GGGAGTGGTGGGGGGTT                       | i1    | 9  |
| <b>CCA</b> CCGGGA--GTGGTGGGGGGTT                               | d2    | 6  |
| <b>CCA</b> CCGA----GTGGTGGGGGGTT                               | d4    | 6  |
| <b>CCA</b> CCGG-----TGGTGGGGGGTT                               | d5    | 4  |
| <b>CCA</b> CCGG-----TGGGGGGTT                                  | d7    | 5  |
| <b>CCA</b> CCGG-----TGGGGGGTT                                  | d8    | 6  |
| <b>CCG</b> CC-GGGAGTGGTGGGGGGTT                                | s1+d1 | 6  |
| <b>CCG</b> CC <b>G</b> GGGGAGTGGTGGGGGGTT                      | s1+i1 | 3  |
| <b>CCG</b> CC--GG-----TGGGGGGTT                                | s1+d7 | 1  |
| <b>CCA</b> T <b>T</b> CCAAGTGGCGGATCGTT                        | other | 1  |
| <b>CCG</b> CCCCGAGCGCCGGATCGTT                                 | other | 1  |
| GGTGGGGGGTT                                                    | other | 2  |
| GTGGGGGGTT                                                     | other | 1  |
| TGGGGGGTT                                                      | other | 1  |
| ARC (47)                                                       |       |    |
| ARC sgRNA1 (WT Sequence)                                       |       |    |
| <b>CCG</b> TGGGAACACTGATGGTAGAC                                |       |    |
| <b>CCG</b> TGGGAACACTGATGGTAGAC                                | no    | 0  |
| <b>CCG</b> T-GGAACACTGATGGTAGAC                                | d1    | 2  |
| ---TGGGAACACTGATGGTAGAC                                        | d3    | 1  |
| <b>CCG</b> <b>C</b> GGGAA---T-- <b>TCG</b> -A-TT               | s2+d7 | 18 |
| <b>CGT</b> TGGGAG <b>GCT</b> CT <b>CCCAT</b> ATGGT <b>CGAC</b> | s4+i5 | 24 |

|                                                                     |       |    |
|---------------------------------------------------------------------|-------|----|
| <b>CGT</b> TGGGAG <b>CTCT</b> <u><b>CCCAT</b></u> ATGGT <b>CGAC</b> | s5+i4 | 1  |
| TAGGGCGAATTGGG                                                      | other | 1  |
| ARC sgRNA2 (WT Sequence)                                            |       |    |
| TCATAATCCTCGATGATTTG <b>TGG</b>                                     |       |    |
| TCATAATCCTCGATGATTTG <b>TGG</b>                                     | no    | 7  |
| TCATA <b>G</b> TCCTCGATGATTTG <b>TGG</b>                            | s1    | 1  |
| TCATAATCCTCGATGA <b>T</b> TTT <b>TGG</b>                            | i1    | 4  |
| TCATAATCCTCGATGATT-G <b>TGG</b>                                     | d1    | 16 |
| TCATAATCCTCGATG-TTTG <b>TGG</b>                                     | d1    | 1  |
| TCATAATCCTCGAT--TTTG <b>TGG</b>                                     | d2    | 6  |
| TCATAATCCTCGA---TTTG <b>TGG</b>                                     | d3    | 7  |
| TCAC <b>A</b> ATCCTCGATGA <b>T</b> TTT <b>TGG</b>                   | s1+i1 | 1  |
| TCATAATCCTCGAC <b>GAT</b> <b>T</b> TTT <b>TGG</b>                   | s1+i1 | 2  |
| TCATAATCCTCGATC--TTG <b>TGG</b>                                     | s1+d2 | 1  |

Blue and red font represent sgRNA sequences and PAM sequences, respectively. The 'd' represent the deletion genotype. 'i' represent the insertion genotype. 's' represent the substitute genotype. 'other' represent the complex mutation genotype, these mutations may not be caused by Cas9 nucleases. Black fonts with horizontal lines, blue fonts, and red fonts represent the insertion base, mutation base, and PAMs, respectively. The '-' symbol represent the deletion base.

**Table S4** The summary of variants calling by the Samtools and Genome Analysis Toolkit (GATK) software.

| SNPs           |           |           |           |             | indels         |          |         |         |             |
|----------------|-----------|-----------|-----------|-------------|----------------|----------|---------|---------|-------------|
| samples        | Samtools  | GATK      | comm      | concordance | samples        | Samtools | GATK    | comm    | concordance |
| WT (s79)       | 3,155,619 | 3,930,853 | 3,078,651 | 1,211,622   | WT (s79)       | 294,466  | 283,343 | 226,996 | 149,327     |
| WT (s195)      | 3,120,442 | 3,858,349 | 3,018,462 | 1,214,683   | WT (s195)      | 284840   | 266119  | 219544  | 152,535     |
| WT (s199)      | 3,102,776 | 3,773,930 | 2,983,787 | 1,210,509   | WT (s199)      | 276963   | 253506  | 209603  | 148,567     |
| Negative (s65) | 3,199,941 | 3,989,704 | 3,111,625 | 1,203,206   | Negative (s65) | 291,586  | 281,447 | 224,578 | 149,636     |
| Negative (s66) | 3,104,199 | 3,761,514 | 2,981,547 | 1,217,124   | Negative (s66) | 275,889  | 252,824 | 208,968 | 148,842     |
| Negative (s67) | 3,084,089 | 3,730,645 | 2,953,171 | 1,209,155   | Negative (s67) | 260,513  | 229,865 | 189,208 | 135,845     |
| AP2 (s1)       | 3,088,928 | 3,850,277 | 3,028,876 | 1,266,777   | AP2 (s1)       | 298,589  | 285,855 | 230,681 | 150,156     |
| AP2 (s3)       | 3,076,586 | 3,866,424 | 3,025,629 | 1,284,258   | AP2 (s3)       | 303,015  | 290,344 | 235,255 | 150,421     |
| AP2 (s4)       | 3,054,148 | 3,759,271 | 2,987,931 | 1,270,814   | AP2 (s4)       | 291,579  | 276,697 | 223,999 | 150,405     |
| AP2 (s15)      | 3,083,515 | 3,854,856 | 3,024,844 | 1,260,704   | AP2 (s15)      | 299,573  | 286,401 | 231,462 | 149,367     |
| AP2 (s20)      | 3,078,241 | 3,841,130 | 3,018,440 | 1,262,125   | AP2 (s20)      | 299,811  | 285,347 | 230,904 | 149,979     |
| AP2 (s23)      | 3,069,588 | 3,818,970 | 3,007,609 | 1,258,810   | AP2 (s23)      | 297,557  | 284,215 | 229,611 | 149,834     |
| MYB44 (s62)    | 3,060,180 | 3,780,173 | 2,994,620 | 1,259,373   | MYB44 (s62)    | 290,422  | 277,896 | 224,805 | 149,594     |
| MYB44 (s75)    | 3,113,850 | 3,943,573 | 3,059,551 | 1,268,973   | MYB44 (s75)    | 304,259  | 291,801 | 235,130 | 150,803     |
| MYB44 (s76)    | 3,082,280 | 3,834,140 | 3,020,862 | 1,261,093   | MYB44 (s76)    | 296,587  | 278,385 | 225,132 | 150,637     |
| MYB44 (s77)    | 3,085,656 | 3,853,163 | 3,023,995 | 1,261,356   | MYB44 (s77)    | 299,411  | 285,137 | 229,841 | 150,166     |
| ARC (s84)      | 3,129,296 | 3,953,628 | 3,068,534 | 1,269,877   | ARC (s84)      | 299,882  | 288,462 | 231,667 | 151,413     |
| ARC (s85)      | 3,099,634 | 3,937,663 | 3,048,233 | 1,277,072   | ARC (s85)      | 303,706  | 289,113 | 233,555 | 149,570     |
| ARC (s91)      | 3,054,742 | 3,740,965 | 2,972,339 | 1,245,699   | ARC (s91)      | 290,667  | 257,004 | 209,034 | 145,824     |
| ARC (s94)      | 3,112,696 | 3,930,615 | 3,055,514 | 1,264,623   | ARC (s94)      | 304,804  | 290,772 | 233,901 | 149,644     |

**Table S5** Genomic distribution of private variations in Cas9-edited plants.

| Cas9-edited plants | #No. total SNPs | #No. total indels | #No. SNPs /indels | #No. intronic | #nonsynonymous SNPs | #No. synonymous SNPs | #No. frameshift indels | #No. nonframe shift indels |
|--------------------|-----------------|-------------------|-------------------|---------------|---------------------|----------------------|------------------------|----------------------------|
|                    | AP2 (s1)        | 4,188             | 500               | 240/9         | 308/51              | 133                  | 104                    | 4                          |
| AP2 (s3)           | 4,893           | 527               | 183/8             | 427/53        | 103                 | 76                   | 5                      | 3                          |
| AP2 (s4)           | 5,976           | 549               | 273/9             | 546/55        | 158                 | 112                  | 6                      | 3                          |
| AP2 (s15)          | 4,345           | 495               | 128/6             | 288/50        | 64                  | 63                   | 3                      | 3                          |
| MYB44 (s62)        | 6,404           | 532               | 233/14            | 456/46        | 111                 | 103                  | 8                      | 6                          |
| MYB44 (s75)        | 2,807           | 312               | 110/5             | 174/19        | 63                  | 45                   | 4                      | 1                          |
| MYB44 (s76)        | 4,595           | 484               | 201/2             | 385/66        | 108                 | 89                   | 1                      | 1                          |
| MYB44 (s77)        | 5,604           | 660               | 229/7             | 361/59        | 118                 | 98                   | 3                      | 2                          |
| ARC (s84)          | 5,839           | 593               | 349/12            | 520/46        | 188                 | 150                  | 4                      | 6                          |
| ARC (s85)          | 5,397           | 745               | 202/2             | 392/67        | 108                 | 83                   | 1                      | 0                          |
| ARC (s91)          | 4,405           | 378               | 229/7             | 431/62        | 123                 | 105                  | 5                      | 2                          |
| ARC (s94)          | 4,660           | 578               | 212/4             | 322/57        | 110                 | 85                   | 4                      | 0                          |

All these variations (Total SNPs/indels) were identified after alignment the genome sequences of CRISPR Cas9-edited plants with WT, negative plants and TM-1 reference genome. These variations in three WT plants has same genotype as three negative plants, but differs from each Cas9-edited plants, which variants called 'total variation' (depth > 20). Total variations (including tissue culture variations, Cas9-edited variations and pre-existing/inherent variations) were annotated by ANNOVAR software and further analyzed off-target site mutations.

Total and private SNPs/indels correspond to **Table S4**.

**Table S6** Summary of the off-target sites across 6 sgRNA of three target genes.

| Target Gene  | sgRNA  | No.of mismatch | No.of NGG sites | No.of NAG sites | No.of NGA sites |
|--------------|--------|----------------|-----------------|-----------------|-----------------|
| <i>AP2</i>   | sgRNA1 | 0              | 2               | 0               | 0               |
|              |        | 1              | 0               | 0               | 0               |
|              |        | 2              | 2               | 0               | 0               |
|              |        | 3              | 6               | 0               | 0               |
|              |        | 4              | 33              | 23              | 72              |
|              | 5      | 398            | 34              | 83              |                 |
|              | sgRNA2 | 0              | 2               | 0               | 0               |
|              |        | 1              | 1               | 0               | 1               |
|              |        | 2              | 0               | 0               | 0               |
|              |        | 3              | 7               | 0               | 0               |
| 4            |        | 44             | 24              | 38              |                 |
| 5            | 711    | 31             | 44              |                 |                 |
| <i>MYB44</i> | sgRNA1 | 0              | 1               | 0               | 0               |
|              |        | 1              | 1               | 0               | 0               |
|              |        | 2              | 0               | 0               | 0               |
|              |        | 3              | 1               | 0               | 0               |
|              |        | 4              | 39              | 27              | 55              |
|              | 5      | 641            | 28              | 96              |                 |
|              | sgRNA2 | 0              | 1               | 0               | 0               |
|              |        | 1              | 0               | 0               | 0               |
|              |        | 2              | 1               | 0               | 0               |
|              |        | 3              | 3               | 0               | 0               |
| 4            |        | 20             | 6               | 9               |                 |
| 5            | 157    | 2              | 6               |                 |                 |
| <i>ARC</i>   | sgRNA1 | 0              | 2               | 0               | 0               |
|              |        | 1              | 0               | 0               | 0               |
|              |        | 2              | 5               | 0               | 0               |
|              |        | 3              | 2               | 0               | 0               |
|              |        | 4              | 30              | 32              | 26              |
|              | 5      | 302            | 34              | 28              |                 |
|              | sgRNA2 | 0              | 2               | 0               | 0               |
|              |        | 1              | 0               | 0               | 0               |
|              |        | 2              | 7               | 0               | 0               |
|              |        | 3              | 14              | 3               | 0               |
| 4            |        | 131            | 79              | 99              |                 |
| 5            | 730    | 87             | 150             |                 |                 |

The sgRNA sequences alignment were aligned TM-1 reference genome with mismatch

(K=0,1,2,3,4,5), the NGG, NAG, NGA were identified from 6 sgRNA sequence.

**Table S7 Identification of most off-target site mutations in CRISPR-Cas9**

edited plants.

| sgRNA        | chr | start    | end      | on-target seq           | off-target seq           | strand | Mis | off score | region      |
|--------------|-----|----------|----------|-------------------------|--------------------------|--------|-----|-----------|-------------|
| AP2 sgRNA1   | D12 | 12822662 | 12822681 | ATGGTTGCATCCTGCCTAAAAGC | ATGGTTGCATCTTGCCCAAAAGG  | +      | 2   | 0.3801    | intergenic  |
| AP2 sgRNA1   | D11 | 2751318  | 2751337  | ATGGTTGCATCCTGCCTAAAAGG | CTCATTGCAACCTGCCTAAAAGG  | -      | 4   | 0.2543    | intergenic  |
| AP2 sgRNA1   | A12 | 17258789 | 17258808 | ATGGTTGCATCCTGCCTAAAAGG | GTGGTTGCATCTTGCCCAAAAGG  | +      | 4   | 0.2047    | intergenic  |
| AP2 sgRNA1   | A09 | 69549317 | 69549336 | ATGGTTGCATCCTGCCTAAAAGG | ATGGTTACATCCTTCATAAATGG  | +      | 3   | 0.2667    | intergenic  |
| AP2 sgRNA1   | D09 | 44586497 | 44586516 | ATGGTTGCATCCTGCCTAAAAGG | ATGGTTACATCCTTCATAAATGG  | +      | 4   | 0.1882    | intergenic  |
| AP2 sgRNA1   | A12 | 17278848 | 17278867 | ATGGTTGCATCCTGCCTAAAAGG | ATGGTTGCGTCTGCCTAAAAGG   | +      | 2   | 0.359     | Gh_A12G0630 |
| AP2 sgRNA1   | A03 | 98326096 | 98326115 | ATGGTTGCATCCTGCCTAAAAGG | ATGCTTACTTACTGCATAAATGG  | +      | 5   | 0.2382    | Gh_A03G1709 |
| AP2 sgRNA1   | A09 | 61347280 | 61347299 | ATGGTTGCATCCTGCCTAAAAGG | ATGGTGAATCCTACACAAATGG   | +      | 5   | 0.2202    | Gh_A09G1072 |
| AP2 sgRNA1   | D02 | 33199969 | 33199988 | ATGGTTGCATCCTGCCTAAAAGG | TCAGATGCATCTTGCCTAAAAGG  | -      | 5   | 0.1731    | Gh_D02G1133 |
| AP2 sgRNA1   | D01 | 23350527 | 23350546 | ATGGTTGCATCCTGCCTAAAAGG | ATGCTTGTATCTAGCATAAATGG  | +      | 5   | 0.1727    | Gh_D01G1114 |
| AP2 sgRNA2   | A04 | 43872229 | 43872248 | TTATACCATCGGACTTTGCTAGG | TTATCCCAATAGACTTTGCTGGG  | +      | 4   | 0.437     | Intergenic  |
| AP2 sgRNA2   | D03 | 12150785 | 12150804 | TTATACCATCGGACTTTGCTAGG | TCATACCATCAGGCATTGCTTGG  | -      | 4   | 0.3236    | Intergenic  |
| AP2 sgRNA2   | A13 | 79889925 | 79889944 | TTATACCATCGGACTTTGCTAGG | CTATACCCTAAGACTTTGCTTGG  | +      | 4   | 0.3184    | Intergenic  |
| AP2 sgRNA2   | D07 | 23406425 | 23406444 | TTATACCATCGGACTTTGCTAGG | TTGAAAAATCGGACTTTTCTGGG  | -      | 4   | 0.2902    | Intergenic  |
| AP2 sgRNA2   | D08 | 48109735 | 48109754 | TTATACCATCGGACTTTGCTAGG | TTGTACTATCAGACTTAGCTCGG  | +      | 4   | 0.2648    | Intergenic  |
| AP2 sgRNA2   | D07 | 22204606 | 22204625 | TTATACCATCGGACTTTGCTAGG | CTCATATCAGACTTTGCTTGG    | -      | 5   | 0.3777    | Gh_D07G1374 |
| AP2 sgRNA2   | A11 | 65031770 | 65031789 | TTATACCATCGGACTTTGCTAGG | TTCATACCACAGACTTTGCATGG  | +      | 5   | 0.3142    | Gh_D11G2073 |
| AP2 sgRNA2   | D11 | 46804917 | 46804936 | TTATACCATCGGACTTTGCTAGG | TCATACCACAGACTTTGCATGG   | +      | 5   | 0.3142    | Gh_D11G2379 |
| AP2 sgRNA2   | D01 | 56732921 | 56732940 | TTATACCATCGGACTTTGCTAGG | TTTGGAAATCGAAGCTTCTTGG   | +      | 4   | 0.252     | Gh_D01G1880 |
| AP2 sgRNA2   | A13 | 68637067 | 68637086 | TTATACCATCGGACTTTGCTAGG | TTATATCTTTGGACTCTTCTGGG  | +      | 5   | 0.1665    | Gh_A13G1326 |
| MYB44 sgRNA1 | D03 | 2632420  | 2632439  | TTGGCTGCTCACTGTGTTTATGG | TTGACTGCCCATTTGTGTTAAGG  | +      | 3   | 0.4473    | Intergenic  |
| MYB44 sgRNA1 | A07 | 39572231 | 39572250 | TTGGCTGCTCACTGTGTTTATGG | TTAACTGTGCATGTGTTTACGG   | +      | 4   | 0.3656    | Intergenic  |
| MYB44 sgRNA1 | A05 | 58468963 | 58468982 | TTGGCTGCTCACTGTGTTTATGG | TTGGCTGCACAAATTTATTAGG   | +      | 4   | 0.1769    | Intergenic  |
| MYB44 sgRNA1 | A09 | 44653886 | 44653905 | TTGGCTGCTCACTGTGTTTATGG | TTGGCTGCTCAAAATGTTTACGG  | +      | 4   | 0.1426    | Intergenic  |
| MYB44 sgRNA1 | A07 | 10257230 | 10257249 | TTGGCTGCTCACTGTGTTTATGG | TTGGCTAATCAGCGTGTGGGG    | +      | 4   | 0.1297    | Intergenic  |
| MYB44 sgRNA1 | A02 | 10644862 | 10644881 | TTGGCTGCTCACTGTGTTTATGG | TTTGCTATACACTGTGTTTATAG  | +      | 4   | 0.1053    | Gh_A02G0658 |
| MYB44 sgRNA1 | D09 | 10467714 | 10467733 | TTGGCTGCTCACTGTGTTTATGG | ATAGATGTTCACTATGTTTACGG  | -      | 5   | 0.2812    | Gh_D09G0309 |
| MYB44 sgRNA1 | D06 | 11919999 | 11920018 | TTGGCTGCTCACTGTGTTTATGG | TTGGCTGCTCACGGTGTGTTATGG | -      | 1   | 0.2609    | Gh_D06G0115 |
| MYB44 sgRNA1 | A02 | 74292866 | 74292885 | TTGGCTGCTCACTGTGTTTATGG | ACGACTGCTATCTGTGTTTAGG   | +      | 5   | 0.2057    | Gh_A02G1255 |
| MYB44 sgRNA1 | D13 | 57074404 | 57074423 | TTGGCTGCTCACTGTGTTTATGG | TTGGATACTAAATGTGATTATGG  | +      | 5   | 0.1887    | Gh_D13G2148 |
| MYB44 sgRNA2 | A07 | 64828980 | 64828999 | AACCCCCACCCTCCCGGTGG    | TACCCCCACCCTCCCTAGTGG    | +      | 4   | 0.2985    | intergenic  |
| MYB44 sgRNA2 | D10 | 9119277  | 911946   | AACCCCCACCCTCCCGGTGG    | ATCCCTCCCCACTCCCTGTAGG   | +      | 4   | 0.2388    | intergenic  |
| MYB44 sgRNA2 | A12 | 719393   | 719412   | AACCCCCACCCTCCCGGTGG    | AACCCCCACCCTCCAGAGAGG    | +      | 3   | 0.1328    | intergenic  |
| MYB44 sgRNA2 | A05 | 9705620  | 9705639  | AACCCCCACCCTCCCGGTGG    | CCCCCCCCCACCACCCCGGTGG   | +      | 4   | 0.11      | intergenic  |
| MYB44 sgRNA2 | A09 | 7913489  | 7913508  | AACCCCCACCCTCCCGGTGG    | ATCCCCCTCCACTCCCTGTCTGG  | -      | 5   | 0.0916    | Gh_A09G0255 |
| MYB44 sgRNA2 | D09 | 7729127  | 7729146  | AACCCCCACCCTCCCGGTGG    | ATCCCCCTCCACTCCCTGTCTGG  | -      | 5   | 0.0916    | Gh_D09G0254 |
| MYB44 sgRNA2 | A02 | 5318938  | 5318957  | AACCCCCACCCTCCCGGTGG    | TAAACCACCACCCTCCCTGTAG   | +      | 5   | 0.0894    | Gh_A02G0411 |
| MYB44 sgRNA2 | D02 | 6100141  | 6100160  | AACCCCCACCCTCCCGGTGG    | TAAACCACCACCCTCCCTGTAG   | +      | 5   | 0.0894    | Gh_D02G0464 |
| ARC sgRNA1   | A06 | 35657190 | 35657209 | GTCTACCATCAGTGTTCACAGG  | AGATAACCATAAGTGTTCACAAAG | -      | 4   | 0.5678    | Intergenic  |
| ARC sgRNA1   | A05 | 52470896 | 52470915 | GTCTACCATCAGTGTTCACAGG  | GGCTACCATCAGTGTTCCTATGG  | -      | 4   | 0.4691    | Intergenic  |
| ARC sgRNA1   | D02 | 8172071  | 8172090  | GTCTACCATCAGTGTTCACAGG  | CCTAACATCAGTGTCCCAATGG   | -      | 3   | 0.4422    | Intergenic  |
| ARC sgRNA1   | A09 | 64611259 | 64611278 | GTCTACCATCAGTGTTCACAGG  | ATTTACCATTACTGTTCACAAAG  | -      | 4   | 0.3083    | Gh_A09G1251 |
| ARC sgRNA1   | D09 | 39579827 | 39579846 | GTCTACCATCAGTGTTCACAGG  | ATTTACCATTACTGTTCACAAAG  | -      | 4   | 0.3083    | Gh_D09G1252 |
| ARC sgRNA1   | A01 | 4204724  | 4204743  | GTCTACCATCAGTGTTCACAGG  | GTCACCATCAGTGTTCCTACGG   | +      | 2   | 0.2198    | Gh_A01G0315 |
| ARC sgRNA1   | A01 | 4293938  | 4293957  | GTCTACCATCAGTGTTCACAGG  | GTCACCATCAGTGTTCCTACGG   | +      | 2   | 0.2198    | Gh_A01G0316 |
| ARC sgRNA1   | D05 | 51038057 | 51038076 | GTCTACCATCAGTGTTCACAGG  | GTCACAAATAGTGTTCACAAAG   | +      | 4   | 0.1957    | Gh_D05G3257 |
| ARC sgRNA1   | D01 | 54334257 | 54334276 | GTCTACCATCAGTGTTCACAGG  | GTCGACCAATCAATGTCCCAAGG  | +      | 4   | 0.1667    | Gh_D01G1755 |
| ARC sgRNA1   | A09 | 69004726 | 69004745 | GTCTACCATCAGTGTTCACAGG  | GCTGCCAGAAATGTTCCAAGGG   | +      | 5   | 0.1545    | Gh_A09G1568 |
| ARC sgRNA1   | D09 | 43992591 | 43992610 | GTCTACCATCAGTGTTCACAGG  | GCTGCCAGAAATGTTCCAAGGG   | +      | 5   | 0.1545    | Gh_D09G1639 |
| ARC sgRNA1   | D05 | 53886017 | 53886036 | GTCTACCATCAGTGTTCACAGG  | GTCACAGTCAAGTGTTCACAGG   | +      | 4   | 0.1525    | Gh_D05G3336 |
| ARC sgRNA2   | D05 | 32956550 | 32956569 | TCATAATCCTCGATGATTTGTGG | TCATAATCCTCGATGATCTATGG  | +      | 3   | 0.3516    | Intergenic  |
| ARC sgRNA2   | D05 | 32956550 | 32956569 | TCATAATCCTCGATGATTTGTGG | TCATAATCCTCGATGATCTATGG  | +      | 3   | 0.3516    | Intergenic  |
| ARC sgRNA2   | D09 | 21741173 | 21741192 | TCATAATCCTCGATGATTTGTGG | TCATAATCCTCGATGATTTGTGG  | +      | 3   | 0.35      | Intergenic  |
| ARC sgRNA2   | D06 | 712655   | 712674   | TCATAATCCTCGATGATTTGTGG | TCATATCCTCGATAATTTGTGG   | +      | 2   | 0.3422    | Intergenic  |
| ARC sgRNA2   | A10 | 92192631 | 92192650 | TCATAATCCTCGATGATTTGTGG | ACATAGTAATCAATGATTTGGGG  | +      | 5   | 0.3714    | Gh_A10G1768 |
| ARC sgRNA2   | D10 | 56238563 | 56238582 | TCATAATCCTCGATGATTTGTGG | ACATAGTAATCAATGATTTGGGG  | +      | 5   | 0.3714    | Gh_D10G2042 |
| ARC sgRNA2   | D12 | 36164050 | 36164069 | TCATAATCCTCGATGATTTGTGG | TTATAATGCAAGATGATTTACGG  | -      | 5   | 0.3522    | Gh_D12G1035 |
| ARC sgRNA2   | D01 | 3884189  | 3884208  | TCATAATCCTCGATGATTTGTGG | TCGTAATCCTCGATGATCTATGG  | -      | 3   | 0.2455    | Gh_D01G0350 |
| ARC sgRNA2   | A13 | 31832210 | 31832229 | TCATAATCCTCGATGATTTGTGG | GCATAGCATCAATGAATTTGAGG  | -      | 5   | 0.2401    | Gh_A13G0759 |
| ARC sgRNA2   | A13 | 31833520 | 31833539 | TCATAATCCTCGATGATTTGTGG | GCATAGCATCAATGAATTTGAGG  | -      | 5   | 0.2401    | Gh_A13G0759 |
| ARC sgRNA2   | D13 | 18053006 | 18053025 | TCATAATCCTCGATGATTTGTGG | GCATAGCATCAATGAATTTGAGG  | -      | 5   | 0.2401    | Gh_D13G0892 |
| ARC sgRNA2   | A01 | 4240858  | 4240877  | TCATAATCCTCGATGATTTGTGG | TCGTAATCCTCAATGATCTATGG  | -      | 4   | 0.2292    | Gh_A01G0316 |
| ARC sgRNA2   | D13 | 47057704 | 47057723 | TCATAATCCTCGATGATTTGTGG | TCAAAATCCCAATGATTTAGGG   | +      | 4   | 0.2222    | Gh_D13G1522 |
| ARC sgRNA2   | A07 | 39700638 | 39700657 | TCATAATCCTCGATGATTTGTGG | ACTTTAACCTCGATAATTTGAGG  | +      | 5   | 0.2114    | Gh_A07G1425 |
| ARC sgRNA2   | A01 | 4203983  | 4204002  | TCATAATCCTCGATGATTTGTGG | TCATAATCCTTGTGATGATTTGGG | -      | 2   | 0.2051    | Gh_A01G0315 |
| ARC sgRNA2   | A01 | 4293200  | 4293219  | TCATAATCCTCGATGATTTGTGG | TCATAATCCTTGTGATGATTTGGG | -      | 2   | 0.2051    | Gh_A01G0316 |
| ARC sgRNA2   | A07 | 5177225  | 5177244  | TCATAATCCTCGATGATTTGTGG | TCATAAAACTCAATGAATTTGGG  | +      | 5   | 0.1982    | Gh_A07G0407 |
| ARC sgRNA2   | D07 | 5050977  | 5050996  | TCATAATCCTCGATGATTTGTGG | TCATAAAACTCAATGAATTTGGG  | +      | 5   | 0.1982    | Gh_D07G0472 |

**Table S8 Summary of new off-targets and PAMs in WT plants.**

| New off-targets in WT      | chromosome       | start    | end      | Variation site | Ref     | WT  | DP (s79/s195/199) | off-target position |
|----------------------------|------------------|----------|----------|----------------|---------|-----|-------------------|---------------------|
| AP2 sgRNA1 NGG 20bp        | A05              | 19502751 | 19502770 | 19502756       | T       | G   | 25/59/52          | 6                   |
| AP2 sgRNA1 NGG 20bp        | A06              | 34541568 | 34541587 | 34541580       | T       | G   | 32/55/39          | 13                  |
| AP2 sgRNA1 NGG 20bp        | A09              | 8396135  | 8396154  | 8396150        | C       | G   | 21/38/52          | 16                  |
| AP2 sgRNA1 NGG 20bp        | D12              | 18543548 | 18543567 | 18543562       | C       | T   | 0/100/0           | 15                  |
| AP2 sgRNA1 NGA 20bp        | A06              | 32225104 | 32225123 | 32225107       | G       | C   | 34/36/21          | 4                   |
| AP2 sgRNA2 NGG 20bp        | A12              | 73319510 | 73319529 | 73319523       | C       | T   | 45/54/47          | 14                  |
| AP2 sgRNA2 NGG 20bp        | A08              | 6786497  | 6786516  | 6786505        | C       | T   | 31/44/49          | 9                   |
| AP2 sgRNA2 NGG 20bp        | A12              | 10740435 | 10740454 | 10740435       | A       | C   | 22/41/40          | 1                   |
| AP2 sgRNA2 NGG 20bp        | A13              | 68637067 | 68637086 | 68637084       | T       | A   | 0/43/34           | 18                  |
| AP2 sgRNA2 NGG 20bp        | scaffold206_A02  | 100667   | 100686   | 100679         | T       | C   | 16/13/10          | 13                  |
| AP2 sgRNA2 NGG 20bp        | scaffold2075_A08 | 676457   | 676476   | 676457         | T       | G   | 39/44/39          | 1                   |
| AP2 sgRNA2 NGG 20bp        | A07              | 45048982 | 45049001 | 45048989       | T       | TC  | 68/58/58          | 8                   |
| AP2 sgRNA2 NGG 20bp        | A08              | 6731830  | 6731849  | 6731836        | GTCGGA  | G   | 20/36/35          | 7                   |
| AP2 sgRNA2 NGG 3bp (PAM)   | D04              | 41357959 | 41357961 | 41357960       | T       | G   | 21/21/19          | 2                   |
| AP2 sgRNA2 NGG 3bp (PAM)   | scaffold1170_A05 | 157085   | 157087   | 157086         | G       | C   | 27/24/16          | 2                   |
| AP2 sgRNA2 NGG 3bp (PAM)   | A13              | 44505964 | 44505966 | 44505964       | TG      | T   | 40/27/18          | 1                   |
| AP2 sgRNA2 NAG 20bp        | A02              | 74603143 | 74603162 | 74603155       | A       | C   | 21/40/56          | 13                  |
| AP2 sgRNA2 NAG 20bp        | D10              | 56504343 | 56504362 | 56504354       | C       | T   | 36/48/33          | 12                  |
| AP2 sgRNA2 NGA 20bp        | A01              | 80721063 | 80721082 | 80721072       | C       | T   | 26/23/23          | 10                  |
| AP2 sgRNA2 NGA 20bp        | A10              | 24825259 | 24825278 | 24825262       | T       | G   | 38/42/42          | 4                   |
| MYB44 sgRNA1 NGG 20bp      | A02              | 54133019 | 54133038 | 54133024       | T       | C   | 26/48/45          | 6                   |
| MYB44 sgRNA1 NGG 20bp      | A08              | 43436791 | 43436810 | 43436806       | G       | C   | 23/25/27          | 16                  |
| MYB44 sgRNA1 NGG 20bp      | A08              | 58915777 | 58915796 | 58915792       | G       | C   | 16/0/11           | 16                  |
| MYB44 sgRNA1 NGG 20bp      | A10              | 60143064 | 60143083 | 60143077       | G       | A   | 23/33/25          | 14                  |
| MYB44 sgRNA1 NGG 20bp      | A10              | 60143064 | 60143083 | 60143079       | G       | C   | 24/33/25          | 16                  |
| MYB44 sgRNA1 NGG 20bp      | A12              | 28745286 | 28745305 | 28745297       | C       | A   | 23/17/22          | 12                  |
| MYB44 sgRNA1 NGG 20bp      | D04              | 41447227 | 41447246 | 41447229       | G       | T   | 23/50/40          | 3                   |
| MYB44 sgRNA1 NGG 20bp      | scaffold1168_A05 | 481901   | 481920   | 481903         | C       | T   | 20/0/0            | 3                   |
| MYB44 sgRNA1 NGG 20bp      | scaffold1176_A05 | 1060638  | 1060657  | 1060649        | T       | C   | 27/30/40          | 12                  |
| MYB44 sgRNA1 NGG 20bp      | D01              | 54158410 | 54158429 | 54158414       | CACAATT | C   | 2029/9/7          | 5                   |
| MYB44 sgRNA1 NGG 20bp      | D03              | 902611   | 902630   | 902622         | CT      | C   | 37/80/50          | 12                  |
| MYB44 sgRNA1 NGG 20bp      | scaffold3436_A13 | 13844    | 13863    | 13854          | A       | AAT | 33/22/25          | 11                  |
| MYB44 sgRNA1 NGG 3bp (PAM) | A13              | 59873391 | 59873393 | 59873391       | G       | A   | 31/39/26          | 1                   |
| MYB44 sgRNA1 NGA 20bp      | A02              | 80229603 | 80229622 | 80229604       | T       | G   | 38/42/27          | 2                   |
| MYB44 sgRNA1 NGA 20bp      | A08              | 30355690 | 30355709 | 30355703       | G       | T   | 23/31/19          | 14                  |
| MYB44 sgRNA1 NGA 20bp      | D09              | 22090127 | 22090146 | 22090131       | C       | T   | 27/56/34          | 5                   |
| MYB44 sgRNA2 NGG 20bp      | A09              | 7913489  | 7913508  | 7913504        | G       | T   | 28/41/43          | 16                  |
| MYB44 sgRNA2 NGG 20bp      | A13              | 9292818  | 9292837  | 9292826        | A       | AG  | 0/12/0            | 9                   |
| MYB44 sgRNA2 NGG 20bp      | D06              | 1191807  | 1191826  | 1191809        | A       | AC  | 32/51/44          | 3                   |
| MYB44 sgRNA2 NGG 20bp      | D10              | 919927   | 919946   | 919935         | T       | TA  | 14/34/30          | 9                   |
| MYB44 sgRNA2 NAG 20bp      | D04              | 50384789 | 50384808 | 50384797       | ACC     | A   | 27/32/40          | 9                   |
| ARC sgRNA1 NGG 20bp        | A07              | 16120505 | 16120524 | 16120509       | A       | C   | 24/50/37          | 5                   |
| ARC sgRNA1 NGG 20bp        | A08              | 46070347 | 46070366 | 46070350       | A       | G   | 36/54/44          | 4                   |
| ARC sgRNA1 NGG 20bp        | A08              | 53472735 | 53472754 | 53472753       | C       | T   | 29/27/20          | 19                  |
| ARC sgRNA1 NGG 20bp        | A13              | 50998870 | 50998889 | 50998887       | G       | A   | 57/51/0           | 18                  |
| ARC sgRNA1 NGA 3bp (PAM)   | scaffold757_A04  | 92495    | 92497    | 92496          | A       | G   | 20/23/28          | 2                   |
| ARC sgRNA2 NGG 20bp        | A08              | 26503749 | 26503768 | 26503758       | G       | A   | 24/35/19          | 10                  |
| ARC sgRNA2 NGG 20bp        | A08              | 51413373 | 51413392 | 51413383       | A       | G   | 29/35/33          | 11                  |
| ARC sgRNA2 NGG 20bp        | A08              | 70517445 | 70517464 | 70517445       | T       | C   | 26/22/29          | 1                   |
| ARC sgRNA2 NGG 20bp        | A09              | 21582506 | 21582525 | 21582520       | G       | T   | 22/36/17          | 15                  |
| ARC sgRNA2 NGG 20bp        | D02              | 19915669 | 19915688 | 19915670       | T       | C   | 20/36/39          | 2                   |
| ARC sgRNA2 NGG 20bp        | D05              | 55270261 | 55270280 | 55270261       | T       | C   | 0/33/27           | 1                   |
| ARC sgRNA2 NGG 20bp        | D05              | 55577854 | 55577873 | 55577867       | T       | C   | 24/57/34          | 14                  |
| ARC sgRNA2 NGG 20bp        | D06              | 10843828 | 10843847 | 10843828       | C       | T   | 33/56/52          | 1                   |
| ARC sgRNA2 NGG 3bp (PAM)   | D05              | 54534661 | 54534663 | 54534662       | A       | G   | 0/51/45           | 2                   |
| ARC sgRNA2 NAG 20bp        | A08              | 54198548 | 54198567 | 54198561       | A       | C   | 24/7/9            | 14                  |
| ARC sgRNA2 NAG 20bp        | A08              | 58582960 | 58582979 | 58582977       | T       | C   | 34/50/28          | 18                  |
| ARC sgRNA2 NAG 20bp        | A10              | 21886201 | 21886220 | 21886216       | T       | C   | 19/29/32          | 16                  |
| ARC sgRNA2 NGA 20bp        | A01              | 53924175 | 53924194 | 53924185       | C       | T   | 20/22/33          | 11                  |
| ARC sgRNA2 NGA 20bp        | A06              | 32800431 | 32800450 | 32800431       | C       | G   | 0/45/52           | 1                   |
| ARC sgRNA2 NGA 20bp        | scaffold3629_A13 | 17619    | 17638    | 17632          | T       | C   | 25/50/28          | 14                  |

The production genetic variations in wild-type (WT) can create and break new off-target sites and PAMs. These potential off-target sites involved NGG, NAG, and NGA of PAM types. The 'Ref', 'WT', 'DP', 'off-target position' represent the reference genome site, WT genome genetic variation, sequencing depth, and off-target position relative reference genome position.



**Table S9** Primers used for on-targets and off-targets.

| Loci                   | Target            | Primers                                                                   |
|------------------------|-------------------|---------------------------------------------------------------------------|
| -                      | Cas9              | F: 5' AACCTACAACCTGTGGTAAATCA 3'<br>R: 5' GTGATCCAAATTGAGACTTAGG 3'       |
| Gh_D13G2207            | AP2<br>sgRNA1/2   | F: 5' GCAGTACAGATGGAACCAGGAG 3'<br>R: 5' CCCGGATAGATTTGCACTTT 3'          |
| Gh_A06G0606            | MYB44<br>sgRNA1/2 | F: 5' CATCGGAGTCATCAAGGATCAAAG 3'<br>R: 5' TAGCAATCACACCCTTCATCGC 3'      |
| Gh_A06G0136            | ARC<br>sgRNA1/2   | F: 5' ATGCCCGAGTCTTTCTTTATGG 3'<br>R: 5' ACAGCCCTTCCCATTTTCAAC 3'         |
| D01: 55912563-55913203 | OFTM1             | F: 5' ATAAGCTGACGTGGCAGCT 3'<br>R: 5' GGGCTGTATGGCTAAGGATTTG 3'           |
| D06:1191487-1192127    | OFTM2             | F: 5' TAAGGACCTATCAAGCAAATTCACC 3'<br>R: 5' TTTACAAAAGCGGAGGATGAGAC 3'    |
| A01:4321712-4322352    | OFTM3             | F: 5' TTCAAGGCGTTTTCTACATTTGTC 3'<br>R: 5' TTTCAATTTCTTTTTGTGGTTCCC 3'    |
| A01:4381686-4382326    | OFTM4             | F: 5' AGTAGGACACAAACCAAAGCATCT 3'<br>R: 5' ATGAGGATATTTTCATCACTTCATAAA 3' |
